# Supplementary material for: A GBH/LiBH4 coordination system with favorable dehydrogenation
Source: Royal Society of Chemistry journal article supplement (doi:10.1039/c0jm04485g), 2011-01-01
Supplement: c0jm04485g.pdf [file c0jm04485g.pdf]

## Supplementary information

# A GBH/LiBH<sub>4</sub> coordination system with favorable dehydrogenation

Yanhui Guo,<sup>a</sup> Qinfen Gu,<sup>b</sup> Zaiping Guo,<sup>c</sup> Jianfeng Mao,<sup>c</sup> Huakun Liu,<sup>c</sup> Shixue Dou<sup>c</sup> and Xuebin Yu\*<sup>a, c</sup>

<sup>a</sup> Department of Material Science, Fudan University, Shanghai 200433, China

<sup>b</sup> Australian Synchrotron Company Ltd, Victoria 3168, Australia

<sup>c</sup> Institute for Superconducting and Electronic Materials, University of Wollongong, NSW 2522, Australia

E-mail: [yuxuebin@fudan.edu.cn](mailto:yuxuebin@fudan.edu.cn)

**Table S1** Atomic coordinates following refinement of GBH/LiBH<sub>4</sub> (S1)

| Atom | Wyck. | x/a        | y/b        | z/c        |
|------|-------|------------|------------|------------|
| Li1  | 2a    | 0.3942(19) | 0.4436(58) | 0.5683(26) |
| Li2  | 2a    | 0.3991(18) | 0.5818(34) | 0.0901(27) |
| Li3  | 2a    | 0.2159(25) | 0.0960(35) | 0.8655(22) |
| Li4  | 2a    | 0.6626(18) | 0.9749(38) | 0.2895(19) |
| B21  | 2a    | 0.6100(5)  | 0.6794(9)  | 0.9269(5)  |
| H21a | 2a    | 0.53864    | 0.64197    | 0.89879    |
| H21b | 2a    | 0.63208    | 0.69681    | 1.02014    |
| H21c | 2a    | 0.64305    | 0.55182    | 0.89809    |
| H21d | 2a    | 0.62110    | 0.82884    | 0.88796    |
| B22  | 2a    | 0.5687(6)  | 0.7254(6)  | 0.2312(2)  |
| H22a | 2a    | 0.50258    | 0.65276    | 0.21324    |
| H22b | 2a    | 0.57424    | 0.78433    | 0.15011    |
| H22c | 2a    | 0.57478    | 0.85003    | 0.29368    |
| H22d | 2a    | 0.61963    | 0.60548    | 0.26662    |
| B23  | 2a    | 0.1022(8)  | 0.7668(5)  | 0.4138(4)  |
| H23a | 2a    | 0.10441    | 0.82445    | 0.32957    |
| H23b | 2a    | 0.13405    | 0.88703    | 0.47801    |
| H23c | 2a    | 0.03409    | 0.74059    | 0.40664    |
| H23d | 2a    | 0.13824    | 0.61656    | 0.43549    |
| B24  | 2a    | 0.2477(5)  | 0.7184(1)  | 0.2817(8)  |
| H24a | 2a    | 0.21460    | 0.87068    | 0.24760    |
| H24b | 2a    | 0.31586    | 0.72855    | 0.28133    |
| H24c | 2a    | 0.24286    | 0.69654    | 0.36653    |
| H24d | 2a    | 0.21455    | 0.58642    | 0.22710    |
| B25  | 2a    | 0.5660(4)  | 0.2523(1)  | 0.7150(2)  |
| H25a | 2a    | 0.60174    | 0.40573    | 0.73771    |

|      |    |           |           |           |
|------|----|-----------|-----------|-----------|
| H25b | 2a | 0.58144   | 0.18603   | 0.64143   |
| H25c | 2a | 0.58679   | 0.15085   | 0.78961   |
| H25d | 2a | 0.49508   | 0.27960   | 0.69177   |
| B26  | 2a | 0.2674(9) | 0.2352(4) | 0.4490(2) |
| H26a | 2a | 0.28776   | 0.25929   | 0.54308   |
| H26b | 2a | 0.22861   | 0.37370   | 0.40828   |
| H26c | 2a | 0.32656   | 0.21493   | 0.42566   |
| H26d | 2a | 0.22705   | 0.09170   | 0.42566   |
| B27  | 2a | 0.7843(1) | 0.2645(3) | 0.9226(6) |
| H27a | 2a | 0.84861   | 0.22899   | 0.98804   |
| H27b | 2a | 0.79670   | 0.30043   | 0.84218   |
| H27c | 2a | 0.74231   | 0.12759   | 0.91669   |
| H27d | 2a | 0.75414   | 0.40291   | 0.94920   |
| B28  | 2a | 0.7410(8) | 0.7263(8) | 0.7510(1) |
| H28a | 2a | 0.72353   | 0.61166   | 0.80879   |
| H28b | 2a | 0.81043   | 0.76913   | 0.79013   |
| H28c | 2a | 0.72786   | 0.65069   | 0.66852   |
| H28d | 2a | 0.70047   | 0.86948   | 0.74148   |
| C1   | 2a | 0.4883(8) | 0.7549(7) | 0.5035(6) |
| N1a  | 2a | 0.44758   | 0.92045   | 0.47885   |
| H1a  | 2a | 0.39747   | 0.91890   | 0.43827   |
| H1b  | 2a | 0.40300   | 0.58564   | 0.42607   |
| N1b  | 2a | 0.45311   | 0.58717   | 0.46665   |
| H1c  | 2a | 0.47083   | 1.03105   | 0.50318   |
| H1d  | 2a | 0.48001   | 0.47811   | 0.48294   |
| N1c  | 2a | 0.56448   | 0.75733   | 0.56519   |
| H1e  | 2a | 0.58513   | 0.64950   | 0.57650   |
| H1f  | 2a | 0.58153   | 0.86633   | 0.58443   |
| C2   | 2a | 0.8519(2) | 0.2488(5) | 0.6830(2) |
| N2a  | 2a | 0.89255   | 0.08237   | 0.70114   |
| H2a  | 2a | 0.87468   | -0.01805  | 0.66050   |
| H2b  | 2a | 0.76632   | 0.16234   | 0.56258   |
| N2b  | 2a | 0.78418   | 0.26276   | 0.60322   |
| H2c  | 2a | 0.93720   | 0.07317   | 0.75375   |
| H2d  | 2a | 0.75741   | 0.37247   | 0.59128   |
| N2c  | 2a | 0.87906   | 0.40127   | 0.74473   |
| H2e  | 2a | 0.85053   | 0.49774   | 0.72817   |
| H2f  | 2a | 0.92103   | 0.38036   | 0.79187   |
| C3   | 2a | 0.8655(5) | 0.7629(9) | 0.1849(9) |
| N3a  | 2a | 0.78789   | 0.75427   | 0.13002   |
| H3a  | 2a | 0.76224   | 0.64332   | 0.12298   |
| H3b  | 2a | 0.87861   | 0.49234   | 0.22225   |

|     |    |           |           |           |
|-----|----|-----------|-----------|-----------|
| N3b | 2a | 0.90427   | 0.60327   | 0.22930   |
| H3c | 2a | 0.76237   | 0.85954   | 0.10082   |
| H3d | 2a | 0.95546   | 0.60903   | 0.26554   |
| N3c | 2a | 0.90450   | 0.93145   | 0.19568   |
| H3e | 2a | 0.95201   | 0.92408   | 0.23062   |
| H3f | 2a | 0.87629   | 1.02230   | 0.16603   |
| C4  | 2a | 0.9969(8) | 0.7936(8) | 0.9969(6) |
| N4a | 2a | 1.03606   | 0.92531   | 0.95935   |
| H4a | 2a | 1.08869   | 0.92502   | 0.97955   |
| H4b | 2a | 1.09047   | 0.66119   | 1.08532   |
| N4b | 2a | 1.03784   | 0.66147   | 1.06513   |
| H4c | 2a | 1.00914   | 1.01241   | 0.91439   |
| H4d | 2a | 1.01208   | 0.57466   | 1.08988   |
| N4c | 2a | 0.91707   | 0.79406   | 0.96624   |
| H4e | 2a | 0.89784   | 0.70834   | 0.99304   |
| H4f | 2a | 0.89669   | 0.87999   | 0.92423   |

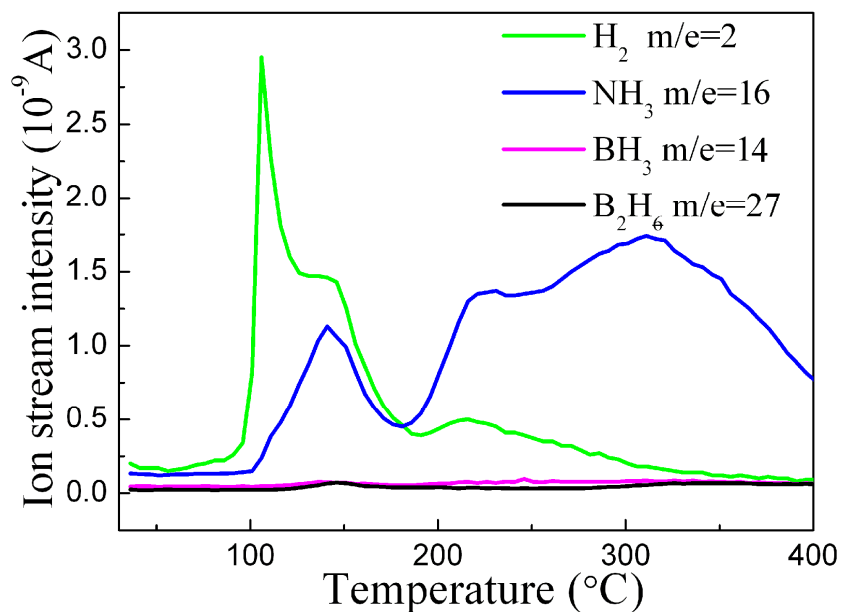

(a)

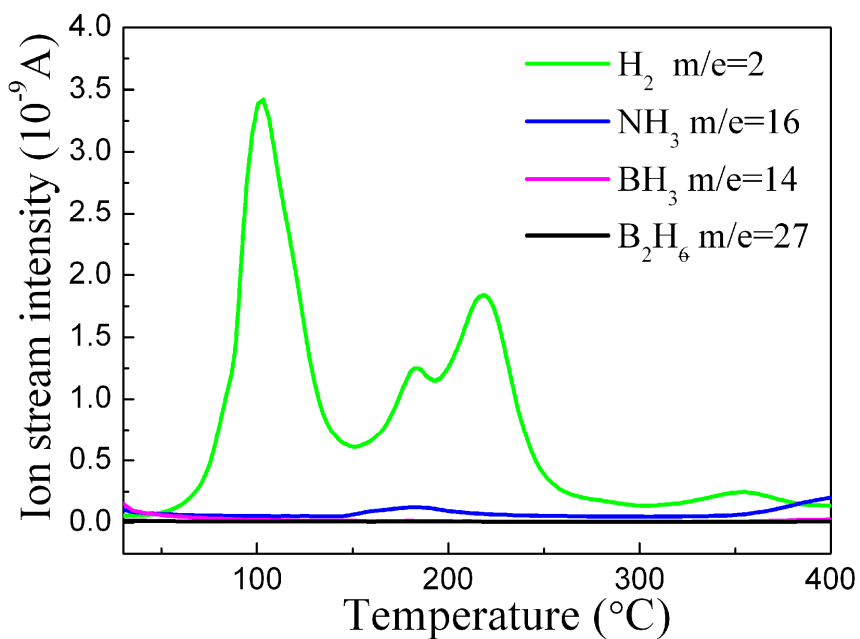

(b)

Fig. S1. Mass spectrometry (MS) analysis of GBH (a) and the GBH/2LiBH<sub>4</sub> (b) composite.

The figure shows that GBH undergoes an apparent two-step ammonia release, the first occurring at temperatures from 100 to 180  $^{\circ}$ C and the second from 180 to 400  $^{\circ}$ C, while only a trace of ammonia release can be observed from GBH/2LiBH<sub>4</sub> over the same temperature range, indicating a significant improvement in the suppression of NH<sub>3</sub> release from the GBH/2LiBH<sub>4</sub>.

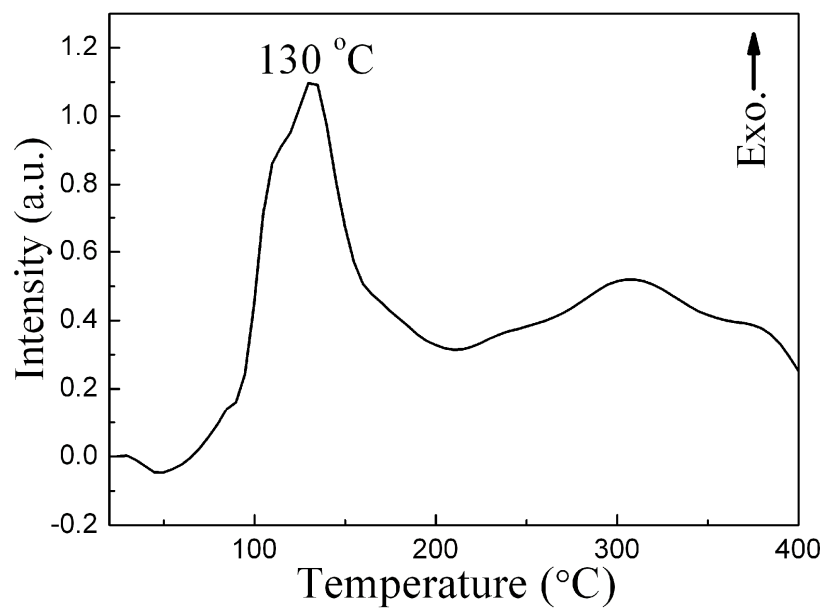

Fig. S2. DTA results for GBH / 2LiBH<sub>4</sub>.

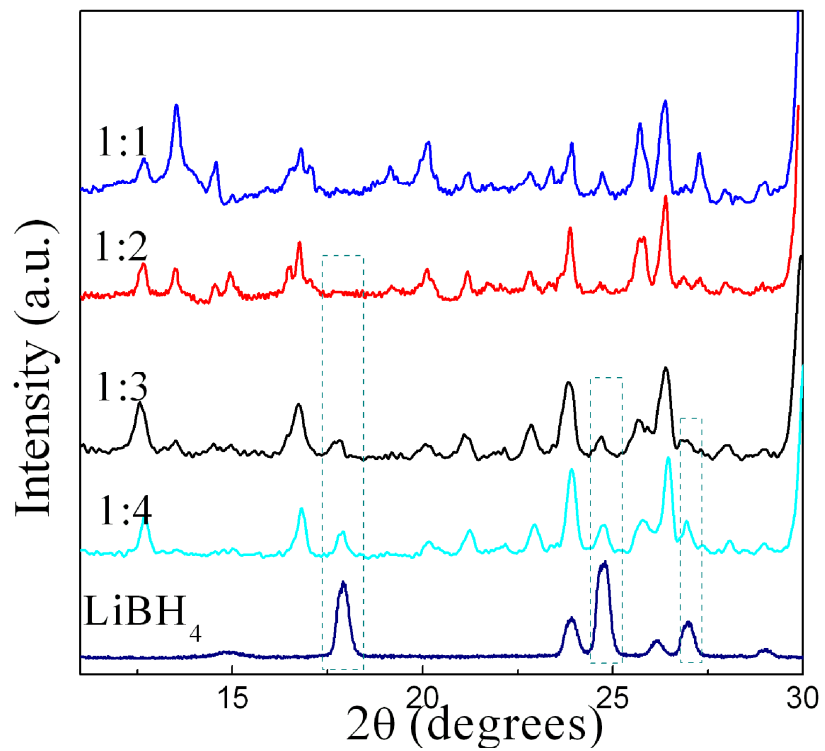

Fig. S3. XRD patterns of LiBH<sub>4</sub> and GBH/LiBH<sub>4</sub> compositions with various mole ratios.

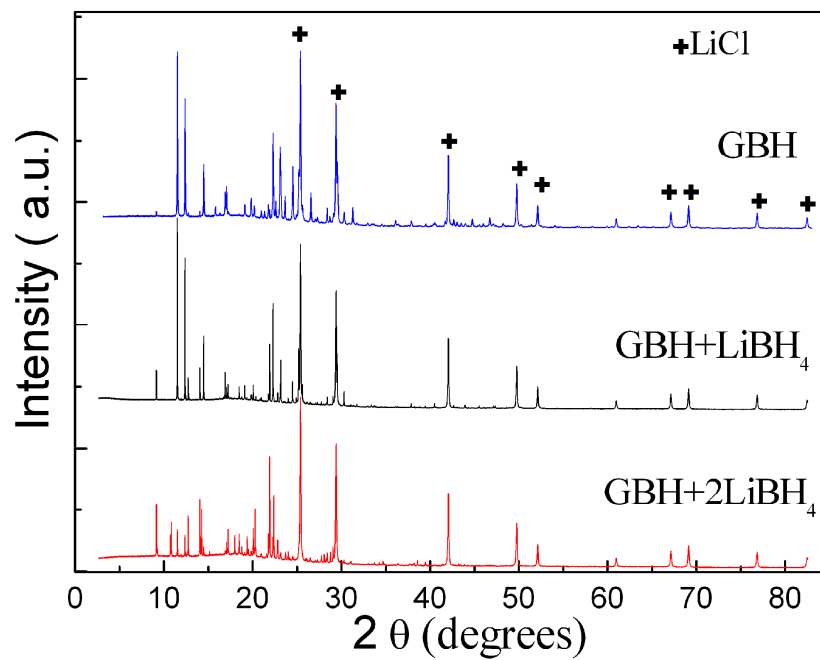

Fig. S4. Comparison of calculated XRD patterns of GBH, LiBH<sub>4</sub> with high-resolution XRD patterns of GBH/LiBH<sub>4</sub> and GBH/2LiBH<sub>4</sub>.

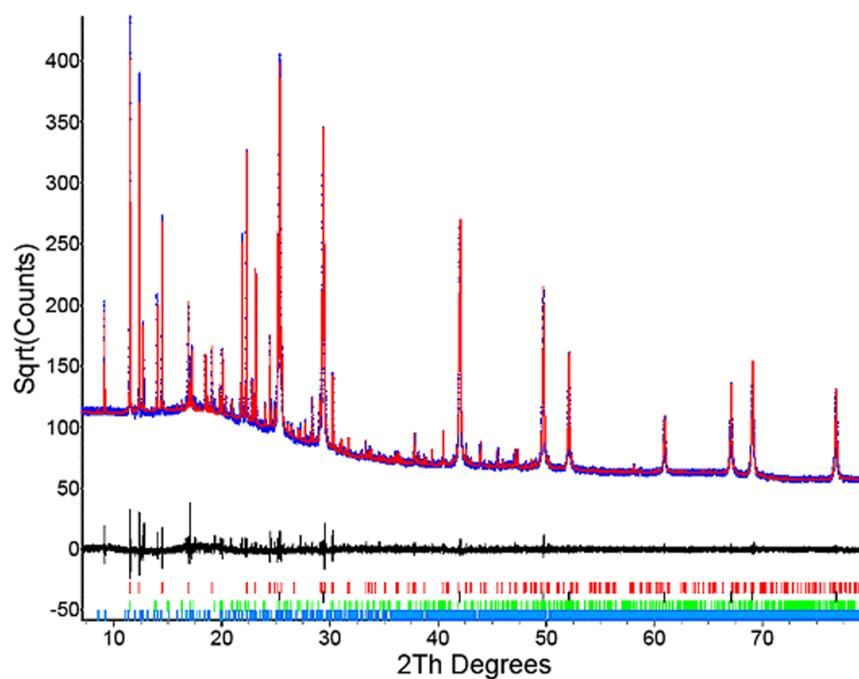

Fig. S5. Rietveld refinement profile for GBH/LiBH<sub>4</sub> phase showing observed (blue), calculated (red), difference (black) plots. The position of Bragg reflections (tick marks) from top to bottom are shown for GBH, LiCl, C(NH<sub>2</sub>)<sub>3</sub>Cl, and LiC(NH<sub>2</sub>)<sub>3</sub>(BH<sub>4</sub>)<sub>2</sub>. A small amount of unreacted C(NH<sub>2</sub>)<sub>3</sub>Cl is observed in the sample due to an incomplete solid state reaction.



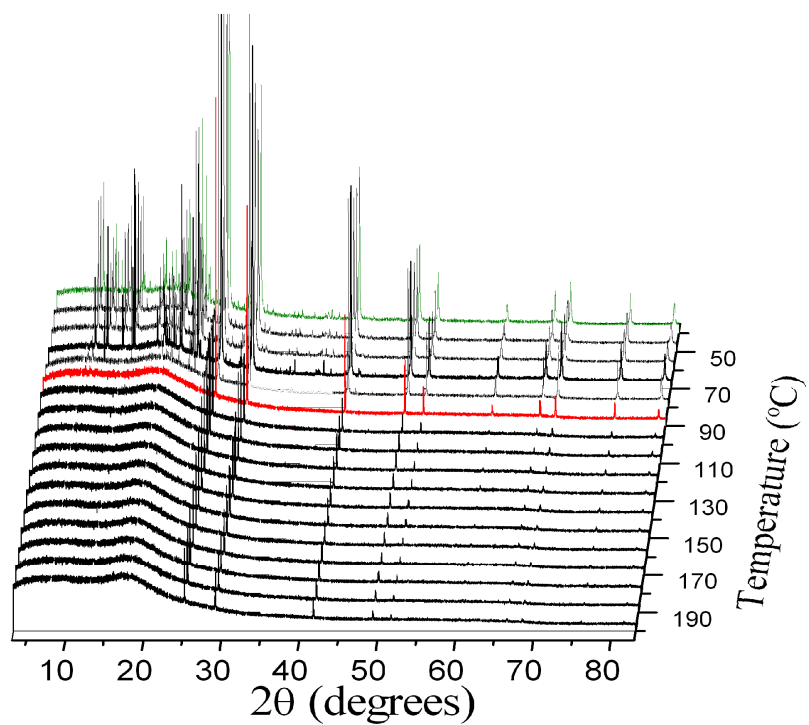

Fig. S6. (a) *In-situ* high-resolution XRD patterns for GBH/2LiBH<sub>4</sub> composite. (b) selected part of (a).
